# Supplementary material for: Cyclic-di-GMP binds to histidine kinase RavS to control RavS-RavR phosphotransfer and regulates the bacterial lifestyle transition between virulence and swimming
Source: PubMed Central journal article supplement (PMC6707612; doi:10.1371/journal.ppat.1007952), 2019-08-13
Supplement: ppat.1007952.s001.pdf [file ppat.1007952.s001.pdf]

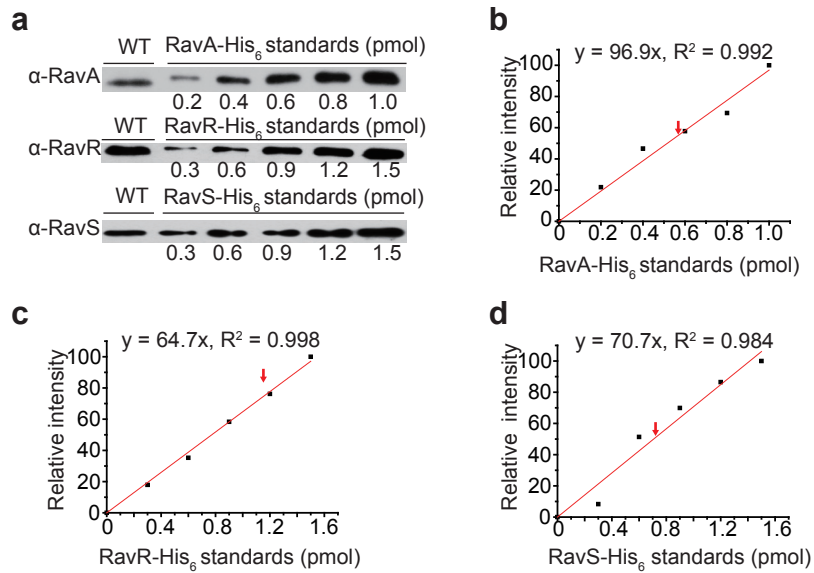

**S1 Fig. Molar ratio of RavA, RavR and RavS in *X. campestris pv. campestris*.**

(a) Semi-quantitative western blotting test of different concentrations of purified protein and cellular RavA, RavR and RavS in *X. campestris pv. campestris*. Three biological replicates were performed with each comprising of three technical repeats. (b–d) Quantification of western blotting band intensities by Image J software in (a) (n = 3).
