# Supplementary material for: Cyclic-di-GMP binds to histidine kinase RavS to control RavS-RavR phosphotransfer and regulates the bacterial lifestyle transition between virulence and swimming
Source: PubMed Central journal article supplement (PMC6707612; doi:10.1371/journal.ppat.1007952), 2019-08-13
Supplement: ppat.1007952.s002.pdf [file ppat.1007952.s002.pdf]

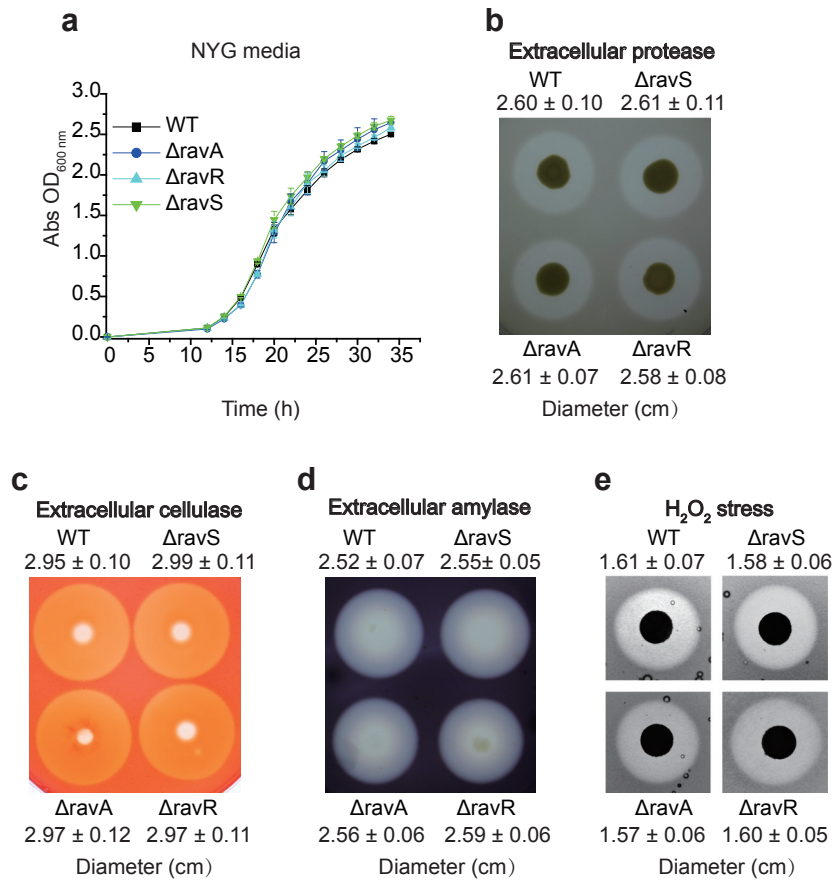

**S2 Fig. Inactivation of *ravS*, *ravR* and *ravA* did not impact bacterial growth, production of extracellular enzymes and the oxidative stress response.** (a) Growth curves of bacterial strains. All strains were cultured overnight in NYG medium. The OD<sub>600</sub> was measured at intervals of 2 h. Standard deviations are given for each data point (n = 3). (b–d) Production of extracellular enzymes of bacterial strains. (b) Extracellular protease. (c) Extracellular cellulase. (d) Extracellular amylase. (e) Resistance to oxidative stress. A 0.2-mL aliquot of each bacterial culture (OD<sub>600</sub> = 0.8) was spread onto an NYG plate and dried at room temperature. Then 5  $\mu$ L of 1.63 M H<sub>2</sub>O<sub>2</sub> was inoculated onto a round filter paper. In (b–e) the plates were incubated at 28 °C for 36 h. Average diameters of degradation or inhibition zones (n = 5) are shown in the figures.
