# Supplementary material for: Cyclic-di-GMP binds to histidine kinase RavS to control RavS-RavR phosphotransfer and regulates the bacterial lifestyle transition between virulence and swimming
Source: PubMed Central journal article supplement (PMC6707612; doi:10.1371/journal.ppat.1007952), 2019-08-13
Supplement: ppat.1007952.s003.pdf [file ppat.1007952.s003.pdf]

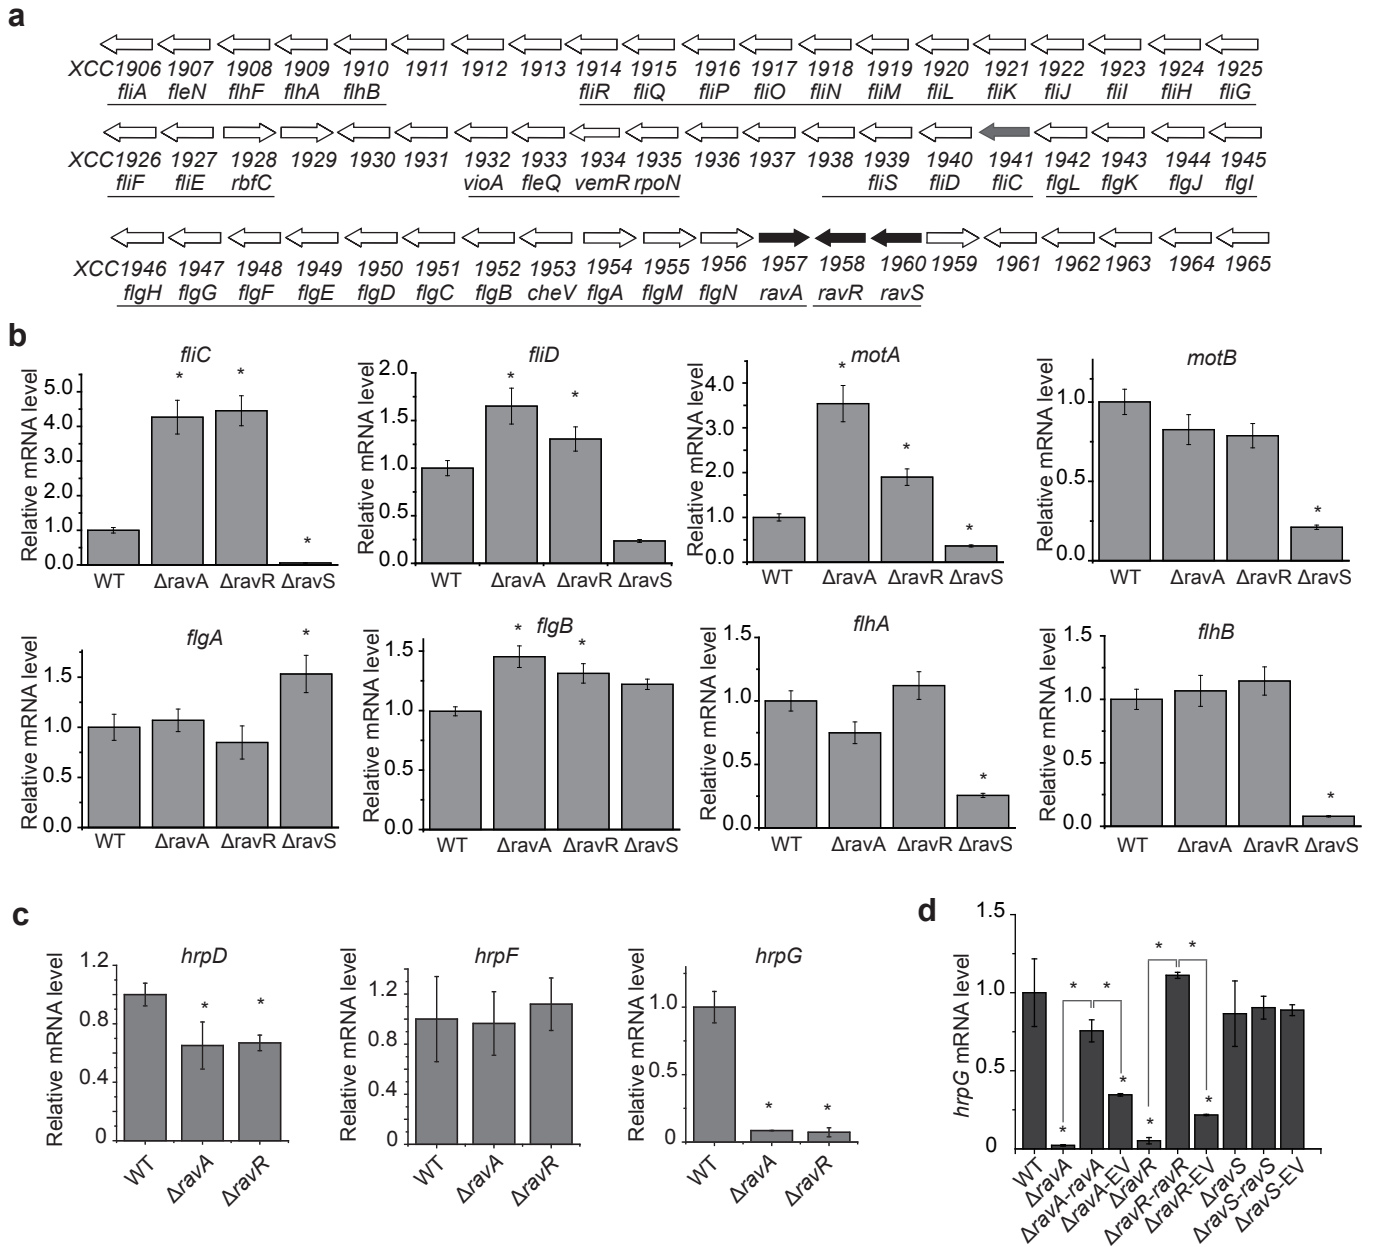

**S3 Fig. mRNA levels of the flagella-related and *hrp* genes in *X. campestris* pv. *campestris*.**

(a) Genetic location of *ravARS* genes and flagella-associated genes. Arrows indicate direction of genes. (b) mRNA levels of flagella-related genes. (c) mRNA levels of *hrp* genes. (d) mRNA levels of *hrpG* gene in various strains. Transcription levels of *fliC*, *fliD*, *motA*, *motB*, *flgA*, *flgB*, *flhA*, *flhB*, *hrpD*, *hrpF* and *hrpG* were quantified by qRT-PCR. In studying *hrp* gene expression, the bacterial cells were induced in the XVM2 medium. Three biological replicates each comprising of three repeats were performed. The average value and standard deviation are shown (n = 3). Asterisk indicates statistically significant ( $P \leq 0.05$ ), as measured by a two-tailed Student's *t*-test.
