# Supplementary material for: Cyclic-di-GMP binds to histidine kinase RavS to control RavS-RavR phosphotransfer and regulates the bacterial lifestyle transition between virulence and swimming
Source: PubMed Central journal article supplement (PMC6707612; doi:10.1371/journal.ppat.1007952), 2019-08-13
Supplement: ppat.1007952.s004.pdf [file ppat.1007952.s004.pdf]

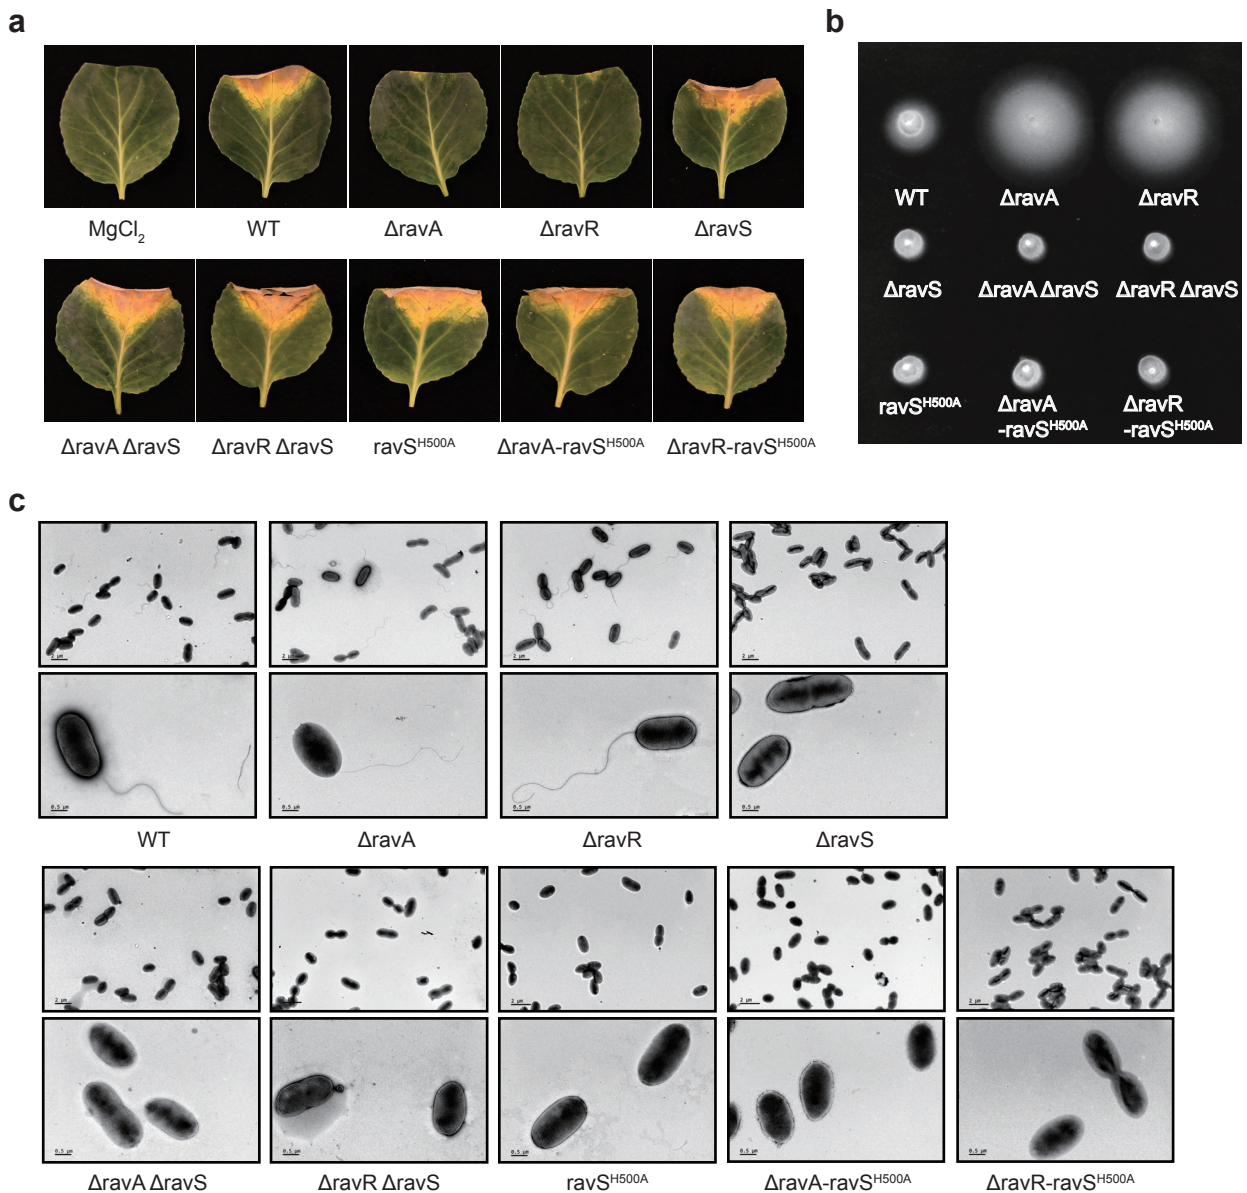

**S4 Fig. Epistasis analysis reveals that *ravS* is downstream of *ravA-ravR* in regulation.**

Deletion of *ravS* or point mutation of the conserved phosphorylation site (*ravS*<sup>H500A</sup>) suppresses the mutational effects of *ravA* or *ravR* deletions. Representative pictures of virulence (a) swimming ability (b) and flagella development (c) are shown.
