# Supplementary material for: Cyclic-di-GMP binds to histidine kinase RavS to control RavS-RavR phosphotransfer and regulates the bacterial lifestyle transition between virulence and swimming
Source: PubMed Central journal article supplement (PMC6707612; doi:10.1371/journal.ppat.1007952), 2019-08-13
Supplement: ppat.1007952.s005.pdf [file ppat.1007952.s005.pdf]

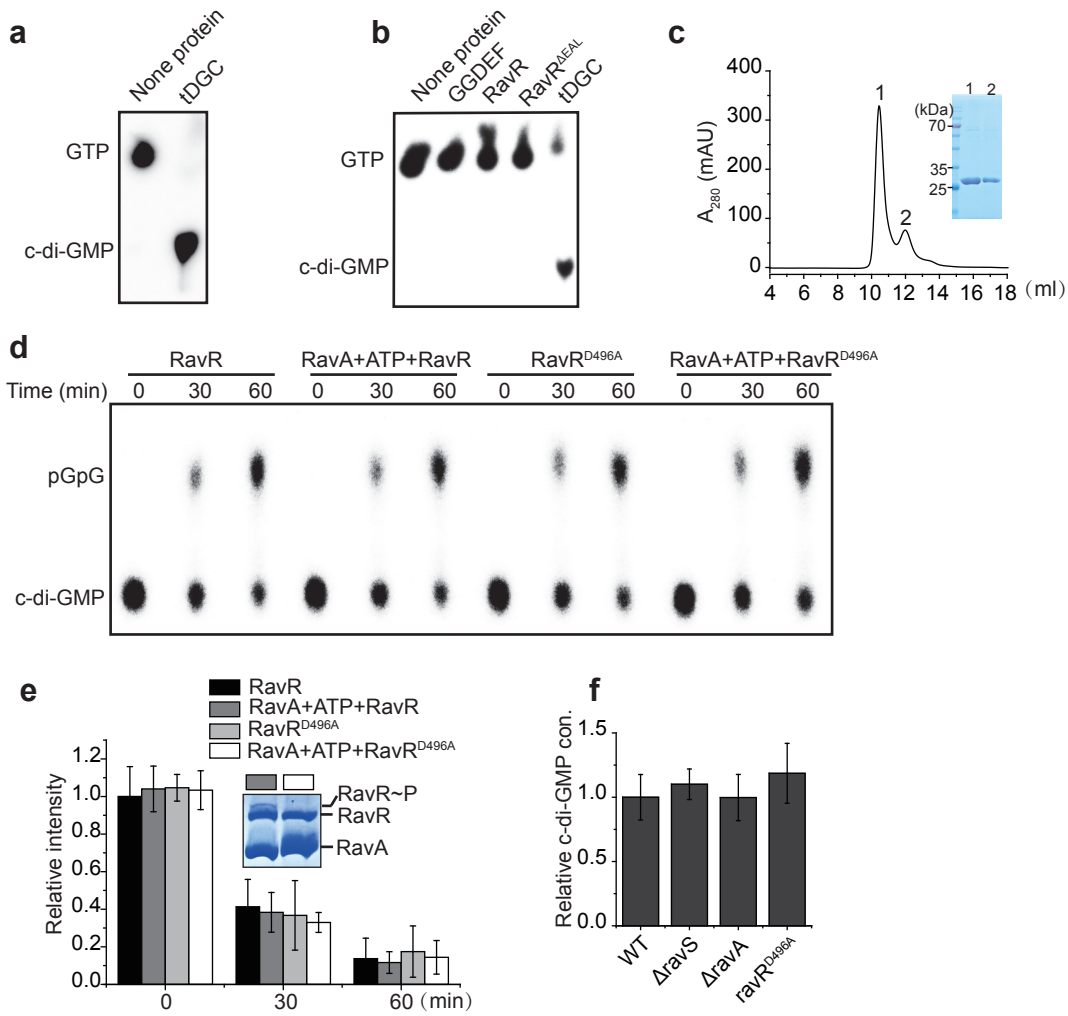

**S5 Fig. EAL domain of RavR has phosphodiesterase activity.** (a) Synthesis of <sup>32</sup>P-labelled c-di-GMP by tDGC cyclase in vitro. c-di-GMP was synthesized and labelled by using tDGC cyclase from [<sup>32</sup>P]GTP. Samples were analysed on thin-layer chromatography (TLC) plates. (b) RavR did not possess diguanylate cyclase (DGC) activity. None or 5 μM affinity purified proteins including GGDEF, RavR, RavR<sup>ΔEAL</sup> or tDGC were added to the DGC reaction mixture with α-<sup>32</sup>P-labelled GTP. After incubation at 28 °C for 60 min, samples were analysed by TLC assays. (c) Recombinant EAL-domain containing protein naturally forms homodimer. The purified EAL protein was separated by a molecular sieve and the molecular weight of each fraction was determined by analytic ultra-centrifugation. (d) Phosphorylation of RavR did not affect its PDE activity. The enzymatic reactions contained 25 μM <sup>32</sup>P-labelled c-di-GMP were analysed by TLC. RavR or RavR<sup>D496A</sup> (5 μM), RavA (10 μM) and ATP (2 mM) were added as indicated. (e) Intensity of the signals in (d), measured by ImageJ. (f) Intracellular c-di-GMP concentrations of various strains detected by LC-MS/MS analysis. All the experiments were repeated independently three times.
