# Supplementary material for: Cyclic-di-GMP binds to histidine kinase RavS to control RavS-RavR phosphotransfer and regulates the bacterial lifestyle transition between virulence and swimming
Source: PubMed Central journal article supplement (PMC6707612; doi:10.1371/journal.ppat.1007952), 2019-08-13
Supplement: ppat.1007952.s006.pdf [file ppat.1007952.s006.pdf]

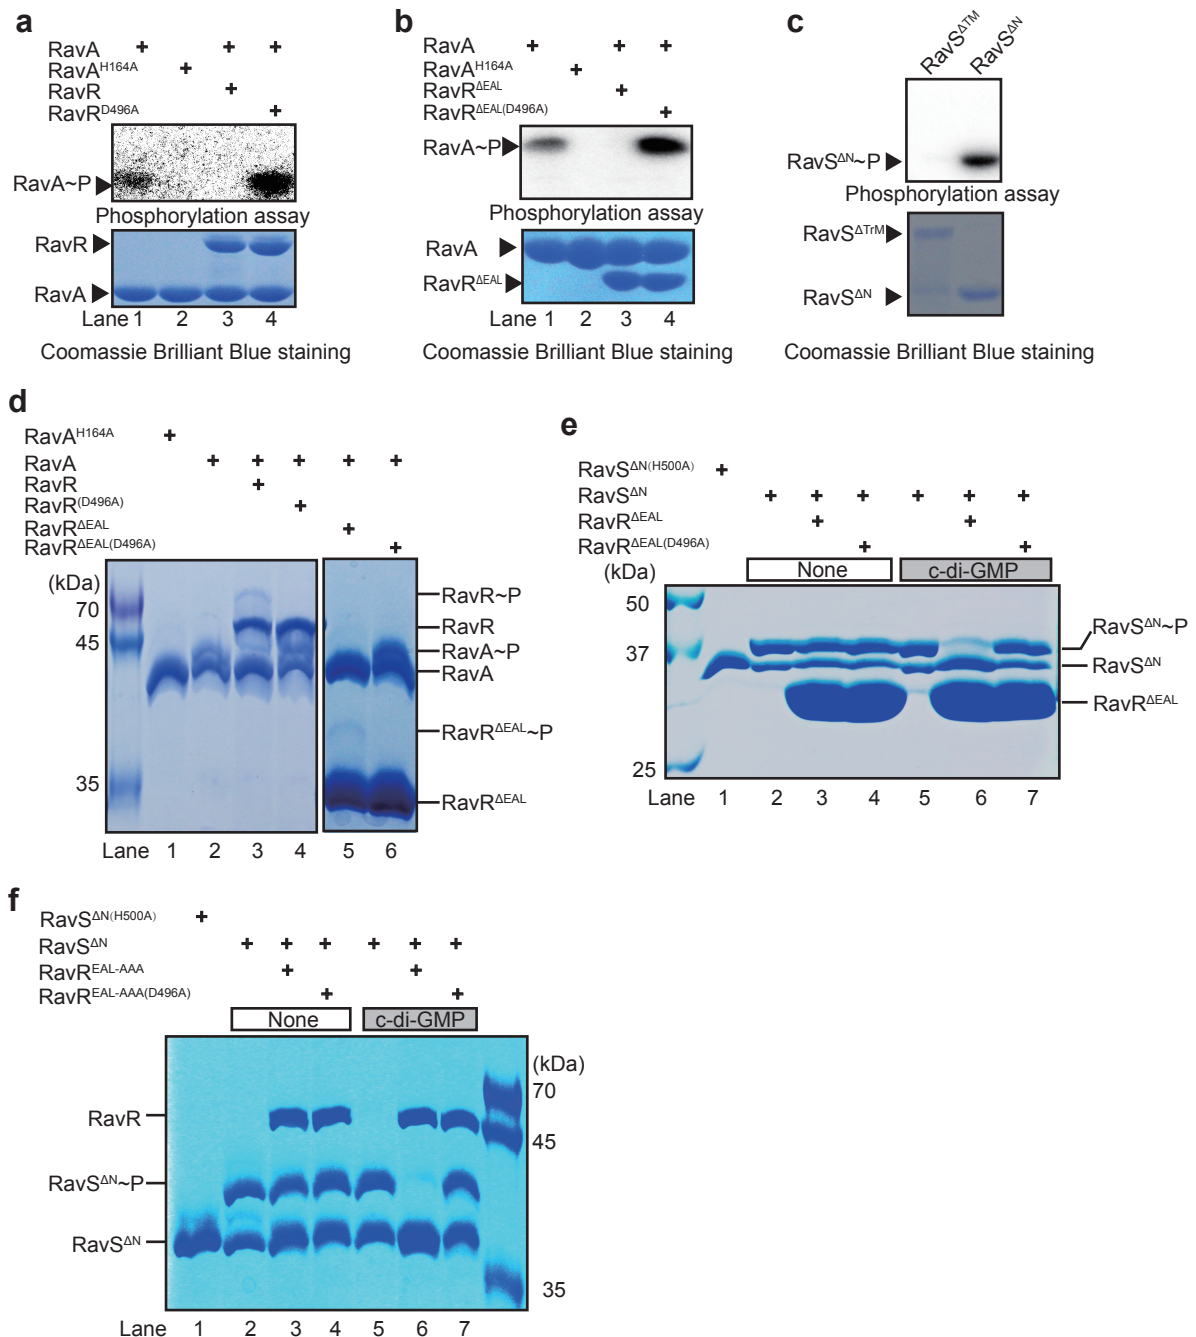

**S6 Fig. Both RavA and RavS have autokinase activity and transfer the phosphoryl group to RavR in a RavR<sup>D496</sup> dependent manner.** (a) RavA phosphorylates RavR in vitro. Autophosphorylation of the histidine kinase RavA and its recombinant derivative RavA<sup>H164A</sup> in the presence of [ $\gamma$ -<sup>32</sup>P]ATP at room temperature for 10 min. RavA phosphotransfer to RavR was then carried out for 30 s. Assays contained 10  $\mu$ M of soluble protein RavA or RavA<sup>H164A</sup>. Ten micromolar RavR or RavR<sup>D496A</sup> was added into the mixtures as indicated. The experiment was repeated three times. (b) RavA phosphorylated the recombinant protein RavR<sup>ΔEAL</sup> in vitro. Assays contained 15  $\mu$ M of soluble protein RavA or RavA<sup>H164A</sup>. Five micromolar RavR<sup>ΔEAL</sup> or RavR<sup>ΔEAL(D496A)</sup> was added as indicated. (c) RavS<sup>ΔN</sup> but not RavS<sup>ΔTrM</sup> possesses robust autophosphorylation activity. Five micromolar of RavS<sup>ΔTrM</sup> or RavS<sup>ΔN</sup> was added into the in vitro autophosphorylation mixture in the presence of [ $\gamma$ -<sup>32</sup>P]ATP at room temperature for 10 min. (d–f) Detection phosphorylated HK and RR using Phos-tag acrylamide gel. (d) RavA phosphorylates RavR or RavR<sup>ΔEAL</sup> in vivo. RavA or RavA<sup>H164A</sup> was incubated with 2 mM ATP at 28 °C for 15 min, respectively. RavR (or RavR<sup>D496A</sup>) or RavR<sup>ΔEAL</sup> (or RavR<sup>ΔEAL(D496A)</sup>) was then added into mixtures for 2 min. (e – f) RavS<sup>ΔN</sup> phosphorylates RavR<sup>ΔEAL</sup> or RavR<sup>EAL-AAA</sup> in vitro. RavS<sup>ΔN</sup> was autophosphorylated with 2 mM ATP at 28 °C for 15 min. A total of 20  $\mu$ M various recombinant RavR proteins, including RavR<sup>ΔEAL</sup>, RavR<sup>ΔEAL(D496A)</sup>, RavR<sup>EAL-AAA</sup> or RavR<sup>EAL-AAA(D496A)</sup> were added and incubated for 30 min at 28 °C. A total of 100  $\mu$ M c-di-GMP were added as indicated. The reactions were stopped with 3  $\times$  SDS loading buffer and the products were separated by 8% or 12% acrylamide gels at 4 °C, the gels were stained with Coomassie brilliant blue (d–f). Each experiment was repeated three times.
