# Supplementary material for: Cyclic-di-GMP binds to histidine kinase RavS to control RavS-RavR phosphotransfer and regulates the bacterial lifestyle transition between virulence and swimming
Source: PubMed Central journal article supplement (PMC6707612; doi:10.1371/journal.ppat.1007952), 2019-08-13
Supplement: ppat.1007952.s010.pdf [file ppat.1007952.s010.pdf]

**S1 Table | Bacterial strains and plasmids used in this study.**

| Strains                                                     | Genotype or properties*                                                                                                                           | Source/<br>Reference |
|-------------------------------------------------------------|---------------------------------------------------------------------------------------------------------------------------------------------------|----------------------|
| <b>Strains</b>                                              |                                                                                                                                                   |                      |
| <i>Escherichia coli</i> strains                             |                                                                                                                                                   |                      |
| DH5 $\alpha$                                                | <i>FhuA2</i> $\Delta$ ( <i>argF-lacZ</i> )U169 <i>phoA glnV44</i><br>$\Phi$ 80 $\Delta$ ( <i>lacZ</i> )M15 <i>gyrA96 recA1 endA1 thi-1 hsdR17</i> | Lab collection       |
| BL21(DE3)                                                   | <i>E.coli B F dcm ompT hsd(r<sub>B</sub>-m<sub>B</sub>)gal <math>\lambda</math>(DE3)</i>                                                          | Novagen              |
| TB1                                                         | <i>ara</i> $\Delta$ ( <i>lac_proAB</i> ) <i>rpsL</i> ( $\Phi$ 80_ <i>lac</i> $\Delta$ ZM15)<br><i>hsdR</i>                                        | BioLabs              |
| <i>Xanthomonas campestris</i> pv. <i>campestris</i> strains |                                                                                                                                                   |                      |
| WT                                                          | Wild-type of <i>X.campestris</i> pv. <i>campestris</i> ATCC 33913                                                                                 | Lab collection       |
| M0300                                                       | $\Delta$ ravA, XCC1957 ( <i>ravA</i> ) in-frame deletion mutant                                                                                   | This study           |
| M0301                                                       | $\Delta$ ravA-EV, $\Delta$ ravA strain containing a blank pHM2 vector, Sp <sup>r</sup>                                                            | This study           |
| M0302                                                       | $\Delta$ ravA-ravA, $\Delta$ ravA strain containing a recombinant vector of pHM2:: <i>PravA-ravA</i> . Sp <sup>r</sup>                            | This study           |
| M0303                                                       | $\Delta$ ravR, XCC1958 ( <i>ravR</i> ) in-frame deletion mutant                                                                                   | This study           |
| M0304                                                       | $\Delta$ ravR-EV, $\Delta$ ravR strain containing a blank pHM2 vector, Sp <sup>r</sup>                                                            | This study           |
| M0305                                                       | $\Delta$ ravR-ravR, $\Delta$ ravR strain containing a recombinant vector of pHM2:: <i>PravS-ravR</i> . Sp <sup>r</sup>                            | This study           |
| M0306                                                       | $\Delta$ ravS, XCC1960 ( <i>ravS</i> ) in-frame deletion mutant                                                                                   | This study           |
| M0307                                                       | $\Delta$ ravS-EV, $\Delta$ ravS strain containing a blank pHM2 vector, Sp <sup>r</sup>                                                            | This study           |
| M0308                                                       | $\Delta$ ravS-ravS, $\Delta$ ravS strain containing a recombinant vector of pHM2:: <i>PravS-ravS</i> . Sp <sup>r</sup>                            | This study           |
| M0309                                                       | $\Delta$ ravA $\Delta$ ravS, double mutant of <i>ravA</i> and <i>ravS</i>                                                                         | This study           |
| M0310                                                       | $\Delta$ ravR $\Delta$ ravS, double mutant of <i>ravR</i> and <i>ravS</i>                                                                         | This study           |
| M0311                                                       | ravS <sup>H500A</sup> , a <i>ravS</i> point mutation with the coding sequence of His <sup>500</sup> being substituted by that of Ala              | This study           |
| M0312                                                       | $\Delta$ ravA-ravS <sup>H500A</sup> , double mutant of <i>ravA</i> and ravS <sup>H500A</sup>                                                      | This study           |
| M0313                                                       | $\Delta$ ravR- ravS <sup>H500A</sup> , double mutant of <i>ravR</i> and ravS <sup>H500A</sup>                                                     | This study           |
| M0314                                                       | ravR <sup><math>\Delta</math>EAL</sup> , <i>ravR</i> with EAL domain in-frame deletion mutant                                                     | This study           |
| M0315                                                       | ravR <sup>D496A</sup> , a <i>ravR</i> point mutation with the coding sequence of Asp <sup>496</sup> being substituted by that of Ala              | This study           |
| M0316                                                       | ravR <sup><math>\Delta</math>EAL(D496A)</sup> , double mutant of ravR <sup><math>\Delta</math>EAL</sup> and ravR <sup>D496A</sup>                 | This study           |
| M0317                                                       | ravR <sup>D496A</sup> -ravS <sup>H500A</sup> , double mutant of ravR <sup>D496A</sup> and ravS <sup>H500A</sup>                                   | This study           |

|       |                                                                                                                                                                                                                  |            |
|-------|------------------------------------------------------------------------------------------------------------------------------------------------------------------------------------------------------------------|------------|
| M0318 | $ravR^{\Delta EAL(D496A)}$ - $ravS^{H500A}$ , triple mutant of $ravR^{\Delta EAL}$ ,<br>$ravR^{\Delta EAL(D496A)}$ and $ravS^{H500A}$                                                                            | This study |
| M0319 | $ravS^{R656A}$ , a $ravS$ point mutation with the coding<br>sequence of Arg <sup>656</sup> being substituted by that of Ala                                                                                      | This study |
| M0320 | $ravR^{\Delta EAL}$ - $ravS^{R656A}$ , double mutant of $ravR^{\Delta EAL}$ and<br>$ravS^{R656A}$                                                                                                                | This study |
| M0321 | $ravS^{R656A-H500A}$ , double mutant of $ravS^{R656A}$ and<br>$ravS^{H500A}$                                                                                                                                     | This study |
| M0322 | $ravR^{\Delta EAL}$ - $ravS^{R656A-H500A}$ , triple mutant of $ravR^{\Delta EAL}$ ,<br>$ravS^{R656A}$ and $ravS^{H500A}$                                                                                         | This study |
| M0323 | $ravR^{\Delta EAL}$ - $\Delta ravS$ -EV, M0341 strain containing a blank<br>vector pBBR1M CS2. Kan <sup>r</sup>                                                                                                  | This study |
| M0324 | $ravR^{\Delta EAL}$ - $\Delta ravS::OE$ - $ravS$ , M0341 strain containing a<br>recombinant vector pBBR1M CS2:: $ravS$ ,<br>overexpression of $ravS$ in M0341 strain. Kan <sup>r</sup>                           | This study |
| M0325 | $ravR^{\Delta EAL}$ - $\Delta ravS::OE$ - $ravS^{H500A}$ , M0341 strain<br>containing a recombinant vector<br>pBBR1MCS2:: $ravS^{H500A}$ , overexpression of $ravS^{H500A}$<br>in M0341 strain. Kan <sup>r</sup> | This study |

### Plasmids

|                           |                                                                                                                                                           |                                |
|---------------------------|-----------------------------------------------------------------------------------------------------------------------------------------------------------|--------------------------------|
| pK18mobsacB               | Suicide plasmid for <i>X. campestris</i> pv. <i>campestris</i> ,<br>Kan <sup>r</sup>                                                                      | (Schafer <i>et al.</i> , 1994) |
| pHM2                      | Complementary vector with no promoter before MCS,<br>Sp <sup>r</sup>                                                                                      | Lab collection                 |
| pBBR1MCS2                 | Broad-host-range vector used for genetic<br>complementation; Kan <sup>r</sup>                                                                             | Lab collection                 |
| pET30a                    | Protein expression vector, Kan <sup>r</sup>                                                                                                               | Novagen                        |
| pET22b                    | Protein expression vector, Amp <sup>r</sup>                                                                                                               | Novagen                        |
| pET28b                    | Protein expression vector, Kan <sup>r</sup>                                                                                                               | Novagen                        |
| pMal-p2X                  | Protein expression vector, Amp <sup>r</sup>                                                                                                               | BioLabs                        |
| pET-RavA                  | pET30a:: $ravA$ , Kan <sup>r</sup> , expressing full-length RavA                                                                                          | This study                     |
| pET-RavA <sup>H164A</sup> | pET30a:: $ravA^{H164A}$ , Kan <sup>r</sup> , expressing full-length<br>RavA with His <sup>164</sup> substituted by that of Ala                            | This study                     |
| pET-RavR                  | pET30a:: $ravR$ , Kan <sup>r</sup> , expressing full-length RavR                                                                                          | This study                     |
| pET-RavR <sup>D496A</sup> | pET30a:: $ravR^{D496A}$ , Kan <sup>r</sup> , expressing full-length<br>RavR with with Asp <sup>496</sup> substituted by that of Ala                       | This study                     |
| pET-RavS <sup>ΔTM</sup>   | pET30a:: $ravS^{\Delta TM}$ Kan <sup>r</sup> , expressing cytosolic RavS<br>(D47-R697), without transmembrane domain                                      | This study                     |
| pET-RavS <sup>ΔN</sup>    | pET30a:: $ravS^{\Delta PAS-A}$ , Kan <sup>r</sup> , expressing cytosolic RavS<br>(E352-R697), without N-terminal transmembrane<br>domain and PAS-A domain | This study                     |
| pET-DHp-CA                | pET30a::DHp-CA, Kan <sup>r</sup> , expressing RavS containing<br>DHp-CA domain (E464-R697)                                                                | This study                     |

|                             |                                                                                                                                                                    |                 |
|-----------------------------|--------------------------------------------------------------------------------------------------------------------------------------------------------------------|-----------------|
| pET-PAS-A                   | pET30a:: <i>PAS-A</i> , Kan <sup>r</sup> , expressing RavS PAS-A domain(T164-R340)                                                                                 | This study      |
| pET-PAS-B                   | pET30a:: <i>PAS-B</i> , Kan <sup>r</sup> , expressing RavS PAS-B domain(E352-P463)                                                                                 | This study      |
| pET-DHP                     | pET30a:: <i>DHp</i> , Kan <sup>r</sup> , expressing RavS DHP domain(E464-L556)                                                                                     | This study      |
| pMal-CA                     | pMal-p2X:: <i>CA</i> , Amp <sup>r</sup> , expressing RavS CA domain (D557-R697) with TEV protease cleavage sequence at the N-terminal of CA.                       | This study      |
| pET-TEV                     | pET22b:: <i>TEV</i> , Amp <sup>r</sup> , expressing TEV protease                                                                                                   | Dr. Jin-Lan Gao |
| pET-DHp-CA <sup>S636A</sup> | pET30a:: <i>DHp-CA</i> <sup>S636A</sup> , Kan <sup>r</sup> , expressing RavS containing DHP and CA domains, with the Ser <sup>636</sup> substituted by that of Ala | This study      |
| pET-DHp-CA <sup>D637A</sup> | pET30a:: <i>DHp-CA</i> <sup>D637A</sup> , Kan <sup>r</sup> , expressing RavS containing DHP and CA domains, with the Asp <sup>637</sup> substituted by that of Ala | This study      |
| pET-DHp-CA <sup>D638A</sup> | pET30a:: <i>DHp-CA</i> <sup>D638A</sup> , Kan <sup>r</sup> , expressing RavS containing DHP and CA domains, with the Asp <sup>638</sup> substituted by that of Ala | This study      |
| pET-DHp-CA <sup>G639A</sup> | pET30a:: <i>DHp-CA</i> <sup>G639A</sup> , Kan <sup>r</sup> , expressing RavS containing DHP and CA domains, with the Gly <sup>639</sup> substituted by that of Ala | This study      |
| pET-DHp-CA <sup>D640A</sup> | pET30a:: <i>DHp-CA</i> <sup>D640A</sup> , Kan <sup>r</sup> , expressing RavS containing DHP and CA domains, with the Asp <sup>640</sup> substituted by that of Ala | This study      |
| pET-DHp-CA <sup>L652A</sup> | pET30a:: <i>DHp-CA</i> <sup>L652A</sup> , Kan <sup>r</sup> , expressing RavS containing DHP and CA domains, with the Leu <sup>652</sup> substituted by that of Ala | This study      |
| pET-DHp-CA <sup>I653A</sup> | pET30a:: <i>DHp-CA</i> <sup>I653A</sup> , Kan <sup>r</sup> , expressing RavS containing DHP and CA domains, with the Ile <sup>653</sup> substituted by that of Ala | This study      |
| pET-DHp-CA <sup>R656A</sup> | pET30a:: <i>DHp-CA</i> <sup>R656A</sup> , Kan <sup>r</sup> , expressing RavS containing DHP and CA domains, with the Arg <sup>656</sup> substituted by that of Ala | This study      |
| pET-DHp-CA <sup>E657A</sup> | pET30a:: <i>DHp-CA</i> <sup>E657A</sup> , Kan <sup>r</sup> , expressing RavS containing DHP and CA domains, with the Glu <sup>657</sup> substituted by that of Ala | This study      |
| pET-DHp-CA <sup>L666A</sup> | pET30a:: <i>DHp-CA</i> <sup>L666A</sup> , Kan <sup>r</sup> , expressing RavS containing DHP and CA domains, with the Leu <sup>666</sup> substituted by that of Ala | This study      |
| pET-EAL                     | pET30a:: <i>EAL</i> , Kan <sup>r</sup> , expressing RavR EAL domain                                                                                                | This study      |
| pET-RavR <sup>ΔEAL</sup>    | pET30a:: <i>ravR</i> <sup>ΔEAL</sup> , Kan <sup>r</sup> , expressing RavR protein                                                                                  | This study      |

|                                         |                                                                                                                                                                       |                        |
|-----------------------------------------|-----------------------------------------------------------------------------------------------------------------------------------------------------------------------|------------------------|
|                                         | without EAL domain                                                                                                                                                    |                        |
| pET-RavR <sup>ΔEAL-</sup><br>(D496A)    | pET30a:: <i>ravR</i> <sup>ΔEAL(D496A)</sup> , Kan <sup>r</sup> , expressing RavR protein with D496A point mutation, without EAL domain                                | This study             |
| pET-tDGC                                | Protein expression vector, pET28b:: tDGC, Kan <sup>r</sup> , expressing tDGC protein with R87A point mutation                                                         | From Dr. Zhaoxun-Liang |
| pKS- <i>ravA</i>                        | pK18mobSacB:: <i>ravA</i> , recombinant suicide vector for constructing Δ <i>ravA</i> strain, Kan <sup>r</sup>                                                        | This study             |
| pKS- <i>ravR</i>                        | pK18mobSacB:: <i>ravR</i> , recombinant suicide vector for constructing Δ <i>ravR</i> strain, Kan <sup>r</sup>                                                        | This study             |
| pKS- <i>ravR</i> <sup>ΔEAL</sup>        | pK18mobSacB:: <i>ravR</i> <sup>ΔEAL</sup> , recombinant suicide vector for constructing <i>ravR</i> <sup>ΔEAL</sup> strain, Kan <sup>r</sup>                          | This study             |
| pKS- <i>ravR</i> <sup>D496A</sup>       | pK18mobSacB:: <i>ravR</i> <sup>D496A</sup> , recombinant suicide vector for constructing <i>ravR</i> <sup>D496A</sup> strain, Kan <sup>r</sup>                        | This study             |
| pKS- <i>ravS</i>                        | pK18mobSacB:: <i>ravS</i> , recombinant suicide vector for constructing Δ <i>ravS</i> strain, Kan <sup>r</sup>                                                        | This study             |
| pKS- <i>ravS</i> <sup>H500A</sup>       | pK18mobSacB:: <i>ravS</i> <sup>H500A</sup> , recombinant suicide vector for constructing <i>ravS</i> <sup>H500A</sup> strain, Kan <sup>r</sup>                        | This study             |
| pKS- <i>ravS</i> <sup>R656A</sup>       | pK18mobSacB:: <i>ravS</i> <sup>R656A</sup> , recombinant suicide vector for constructing <i>ravS</i> <sup>R656A</sup> strain, Kan <sup>r</sup>                        | This study             |
| pKS- <i>ravS</i> <sup>R656A-H500A</sup> | pK18mobSacB:: <i>ravS</i> <sup>R656A-H500A</sup> , recombinant suicide vector for constructing <i>ravS</i> <sup>R656A-H500A</sup> strain, Kan <sup>r</sup>            | This study             |
| pHM2- <i>ravA</i>                       | pHM2::P <sub><i>ravA</i></sub> - <i>ravA</i> , recombinant vector for genetic complementation of <i>ravA</i> mutant, Sp <sup>r</sup>                                  | This study             |
| pHM2- <i>ravR</i>                       | pHM2::P <sub><i>ravS</i></sub> - <i>ravR</i> , recombinant vector for genetic complementation of <i>ravR</i> mutant, Sp <sup>r</sup>                                  | This study             |
| pHM2- <i>ravS</i>                       | pHM2::P <sub><i>ravS</i></sub> - <i>ravS</i> , recombinant vector for genetic complementation of <i>ravS</i> mutant, Sp <sup>r</sup>                                  | This study             |
| pBBR- <i>ravS</i>                       | pBBR1MCS2:: <i>ravS</i> , recombinant vector for overexpression of <i>ravS</i> in <i>ravR</i> <sup>ΔEAL</sup> -Δ <i>ravS</i> strain                                   | This study             |
| pBBR- <i>ravS</i> <sup>H500A</sup>      | pBBR1MCS2:: <i>ravS</i> <sup>H500A</sup> , recombinant vector for overexpression of <i>ravS</i> <sup>H500A</sup> in <i>ravR</i> <sup>ΔEAL</sup> -Δ <i>ravS</i> strain | This study             |

\* Kan<sup>r</sup>, kanamycin resistance; Sp<sup>r</sup>, ) Spectinomycin resistance; Amp<sup>r</sup>, Ampicillin resistance
