# Supplementary material for: Cyclic-di-GMP binds to histidine kinase RavS to control RavS-RavR phosphotransfer and regulates the bacterial lifestyle transition between virulence and swimming
Source: PubMed Central journal article supplement (PMC6707612; doi:10.1371/journal.ppat.1007952), 2019-08-13
Supplement: ppat.1007952.s011.pdf [file ppat.1007952.s011.pdf]

**S2 Table | Primers used in this study.**

| Name                         | Sequence (forward/reverse)                                                                                                         | Length/Description                                                                         |
|------------------------------|------------------------------------------------------------------------------------------------------------------------------------|--------------------------------------------------------------------------------------------|
| $\Delta ravA$                | A: GAATTCCAAGATGCTCTACCCCGAC<br>B: AAGCTTAGCTTCCGGATCGTGTTG<br>C: AAGCTTGAGAAAGAACTTGGCAGT<br>D: GTCGACAAGTGCAGATGCCCGAAG          | AB 403 bp; CD 301 bp;<br>For pKS- <i>ravA</i> construction                                 |
| $\Delta ravR$                | A: GGATCCCTGACCAATGCGTTGCGG<br>B: AAGCTTCGGGATCACAGGGCTCCA<br>C: AAGCTT CATGATGAGTTGCGGAAC<br>D: GTCGACGGCATCATCAACAAGCAC          | AB 300 bp; CD 303 bp; For<br>pKS- <i>ravR</i> construction                                 |
| $\Delta ravS$                | A: GGATCCCATTGCCCGCTCCATGAG<br>B: AAGCTTGTGTTCTTCCACGATCTG<br>C: AAGCTTCTGATCGTGATGCGTGAG<br>D: GTCGACCGATATGGAAGATCATCA           | AB 299 bp; CD 277 bp; For<br>pKS- <i>ravS</i> construction                                 |
| <i>ravR</i> <sup>ΔEAL</sup>  | A: GGATCCGCACGGTAGCGACGAAAT<br>B: GGTACCATGCGCATTGGTGGCCGA<br>C: GGTACCGCCGGCATGGCGCTCCGC<br>D: TCGACGTGTCGGGGTAGAGCATC            | AB 315 bp; CD 275 bp; For<br>pKS- <i>ravR</i> <sup>ΔEAL</sup> construction                 |
| <i>ravR</i> <sup>D496A</sup> | A: GGATCCCTGACCAATGCGTTGCGG<br>B: GTCGACGGCATCATCAACAAGCAC<br>C: AGGTGATCCTCTCCGCCAGCGCATGA<br>D: GCGGAGAGGATCACCTGCACATCGTTG      | AB 2274 bp; For<br>pKS- <i>ravR</i> <sup>D496A</sup><br>construction                       |
| <i>ravS</i> <sup>H500A</sup> | A: GGATCC CATTGCCCGCTCCATGAG<br>B: GTCGAC CGATATGGAAGATCATCA<br>C: CATCTCGCGGACCTGGCCGACGACATC<br>D: GCCAGGTCGCGGAGATGGCGCGGCGTTTC | AB 2262 bp; For<br>pKS- <i>ravS</i> <sup>H500A</sup><br>construction                       |
| C- <i>ravA</i>               | A: GTCGACCGAAGTGCAGATGCCCGA<br>B: GGTACCCTACCGCGGCTGCCGCAC                                                                         | AB 1509 bp; For pHM2<br>- <i>ravA</i> construction                                         |
| C- <i>ravR</i>               | A: GAATTCTCGCTGCTTTCCAGCACTTC<br>B: TGAGGTCGTCGCGGACCATGTGGAGCCCTGTGATC<br>C: ATGGTCCGCGGACGACCTCA<br>D: GGTACCCTATTCCCGGCCGTTCCG  | AB 334 bp; CD 1722 For<br>pHM2 - <i>ravR</i> construction                                  |
| C- <i>ravS</i>               | A: GAATTCTCGCTGCTTTCCAGCACTTC<br>B: GGTACCCTCAACGTCCACCATCTTC                                                                      | AB 2410 bp; For pHM2<br>- <i>ravS</i> construction                                         |
| OX- <i>ravS</i>              | A: AAGCTTATGCACCAACACGTTGCC<br>B: GAGCTCTCAACGTCCACCATCTTCAG                                                                       | AB:2094 bp; For pBBR-<br><i>ravS</i> or pBBR- <i>ravS</i> <sup>H500A</sup><br>construction |
| RT- <i>fliC</i>              | A: GCTTCACCACGCAGATCCG<br>B: TGGTGGCGTTGGCTGACTGC                                                                                  | AB 144 bp; For qRT-PCR<br>analysis of <i>fliC</i>                                          |
| RT- <i>fliD</i>              | A: CGAGAACGCCAACAACG<br>B: GATCGCTTTACGGTCGTCG                                                                                     | AB 142 bp; For qRT-PCR<br>analysis of <i>fliD</i>                                          |

|                           |                                                                                       |                                                                         |
|---------------------------|---------------------------------------------------------------------------------------|-------------------------------------------------------------------------|
| RT- <i>flgA</i>           | A: GGAATCGGGAATCGTCTGAC<br>B: ATCGGGAGTGGGGAATCG                                      | AB 123 bp: For qRT-PCR analysis of <i>flgA</i>                          |
| RT- <i>flgB</i>           | A: CGAAGGCAATCTACCGACCG<br>B: GCCTCGCCGGTCTCAGCTTG                                    | AB 135 bp: For qRT-PCR analysis of <i>flgB</i>                          |
| RT- <i>flhA</i>           | A: CGATGAACGCCCCGCCG<br>B: GAACAGCGCATCCAGCACC                                        | AB 122 bp: For qRT-PCR analysis of <i>flhA</i>                          |
| RT- <i>flhB</i>           | A: CGAACGCACCGAACTACCC<br>B: CTCAGCGCGGTCTTCATCC                                      | AB 175 bp: For qRT-PCR analysis of <i>flhB</i>                          |
| RT- <i>motA</i>           | A: CATCGTCGTCATCGTCAGTG<br>B: ATCTTGCCCTGGCGTGCTC                                     | AB 138 bp: For qRT-PCR analysis of <i>motA</i>                          |
| RT- <i>motB</i>           | A: GTTCGCACAGCACGGGTTC<br>B: CGTGCGGCCGTCATCTC                                        | AB 153 bp: For qRT-PCR analysis of <i>motB</i>                          |
| RT- <i>tmRN</i><br>A      | A: GCAGCTTTCCTCGTTAATCC<br>B: CATGCTTATCCCTCCGTTAG                                    | For qRT-PCR analysis of <i>tmRNA</i>                                    |
| RavA                      | A: CATATGACTGCCAAGTTCTTCTC<br>B: CTCGAGCCGCGGCTGCCGCACCG                              | AB 1227 bp; For pET-RavA construction                                   |
| RavR                      | A: CATATGTGGAGCCCTGTGATC<br>B: CTCGAGTTCCCGGCCGTTCCGCAA                               | AB 1722 bp; For pET-RavR construction                                   |
| RavS <sup>ΔTM</sup>       | A: CATATGAACCGCATGCTCGACCTG<br>B: CTCGAGACGTCCACCATCTTCAGG                            | AB 1956 bp; For pET-RavS <sup>ΔTM</sup> construction                    |
| RavA <sup>H164</sup><br>A | A: GCTGCCGGCGTCGCGGCTGAGATCAAT<br>B: GCCGCGACGCCGGCAGCGAGCTGGC                        | For pET-RavA <sup>H164A</sup> construction                              |
| RavR <sup>D496</sup><br>A | A: AGGTGATCCTCTCCGCCAGCGCATGA<br>B: GCGGAGAGGATCACCTGCACATCGTTG                       | For pET-RavR <sup>D496A</sup> or pKS-ravR <sup>D496A</sup> construction |
| RavS <sup>H500</sup><br>A | A: CATCTCGCGCGACCTGGCC GACGACATC<br>B: GCCAGGTGCGCGGAGATGGCGCGGCGTTC                  | For pKS-ravS <sup>H500A</sup> construction                              |
| R-EAL                     | A: CATATGAGCGAAAGCATCATTGCG<br>B: CTCGAGGGACTCGGCCGACATCGG                            | AB 741 bp; For pET-EAL construction                                     |
| S-PAS-A                   | A: CATATGGCACTTTTACAAGCCAAGTTCC<br>B: CTCGAGACGTTCGGTACGTCCTG                         | AB 732 bp; For pET-PAS-A construction                                   |
| S-PAS-B                   | A: CATATGGAGCAGTTCCGCGAGCTG<br>B: CTCGAGGGGCTCGCTCAGGTCCG                             | AB 336 bp; For protein pET-PAS-B construction                           |
| RavS <sup>ΔN</sup>        | A: CATATGGAGCAGTTCCGCGAGCTG<br>B: CTCGAGACGTCCACCATCTTCAGG                            | AB 1041 bp; For protein pET-RavS <sup>ΔN</sup> construction             |
| S-DHp-C<br>A              | A: CATATGGAGCGCATGCGCGATGCA<br>B: CTCGAGACGTCCACCATCTTCAGG                            | AB 702 bp; For pET-DHP-CA construction                                  |
| S-DHP                     | A: CATATGGAGCGCATGCGCGATGCA<br>B: CTCGAGGAGCTGCGGCGGCCGACG                            | AB 279 bp; For pET-DHP construction                                     |
| S-CA                      | A: GAATTCGAGAACCTGTACTTCCAAGGGGATGCATT<br>GGGGCTGGAAGC<br>B: CTCGAGACGTCCACCATCTTCAGG | AB 423 bp; For pMAL-CA construction                                     |

|                                   |                                                                   |                                                                                          |
|-----------------------------------|-------------------------------------------------------------------|------------------------------------------------------------------------------------------|
| RavS <sup>S636</sup> <sub>A</sub> | A: CTTTCGCCTGGAAGTCGCCGACGATGGC<br>B: GCGACTTCCAGGCGAAAGCCGTTGCCG | For pET-DHP-CA <sup>S636A</sup><br>construction                                          |
| RavS <sup>D637</sup> <sub>A</sub> | A: CGCCTGGAAGTCAGCGCCGATGGCGACG<br>B: GCGCTGACTTCCAGGCGAAAGCCGT   | For pET-DHP-CA <sup>D637A</sup><br>construction                                          |
| RavS <sup>D638</sup> <sub>A</sub> | A: CTGGAAGTCAGCGACGCTGGCGACGGG<br>B: GCGTCGCTGACTTCCAGGCGAAAGCCG  | For pET-DHP-CA <sup>D638A</sup><br>construction                                          |
| RavS <sup>G639</sup> <sub>A</sub> | A: GAAGTCAGCGACGATGCCGACGGGTTC<br>B: GCATCGTCGCTGACTTCCAGGCGA     | For pET-DHP-CA <sup>G639A</sup><br>construction                                          |
| RavS <sup>D640</sup> <sub>A</sub> | A: GTCAGCGACGATGGCGCCGGGTTTCGAA<br>B: TCGCCATCGCCGCTGACTTCCAGGCG  | For pET-DHP-CA <sup>D640A</sup><br>construction                                          |
| RavS <sup>L652</sup> <sub>A</sub> | A: CCGCGTGGTTTGGGGGCGATCGTGATG<br>B: GCCCCCAAACCACGCGGACCTTCCGG   | For pET-DHP-CA <sup>L652A</sup><br>construction                                          |
| RavS <sup>L653A</sup>             | A: CGTGGTTTGGGGCTGGCCGTGATGCGTG<br>B: GCCAGCCCAAACCACGCGGACCTTCC  | For pET-DHP-CA <sup>L653A</sup><br>construction                                          |
| RavS <sup>R656</sup> <sub>A</sub> | A: GGGCTGATCGTGATGGCTGAGCGTGCGC<br>B: GCCATCACGATCAGCCCAAACCACG   | For pET-DHP-CA <sup>R656A</sup> and<br>pKS- <i>ravS</i> <sup>R656A</sup><br>construction |
| RavS <sup>E657</sup> <sub>A</sub> | A: CTGATCGTGATGCGTGCGGTGCGCA<br>B: GCACGCATCACGATCAGCCCAAACC      | For pET-DHP-CA <sup>E657A</sup><br>construction                                          |
| RavS <sup>L666</sup> <sub>A</sub> | A: ACCGTCGGCGGTGCGGCCGCGATAGAA<br>B: GCCGCACCGCCGACGGTTTGCGCACGC  | For pET-DHP-CA <sup>L666A</sup><br>construction                                          |
